# Supplementary figures and images for: Incidence of psychological illness after coronavirus outbreak: a meta-analysis study
Source: PubMed Central journal article supplement — J Epidemiol Community Health. 2021 Feb 25:jech-2020-215927. doi: 10.1136/jech-2020-215927 (PMC7908057; doi:10.1136/jech-2020-215927), 2021-02-25

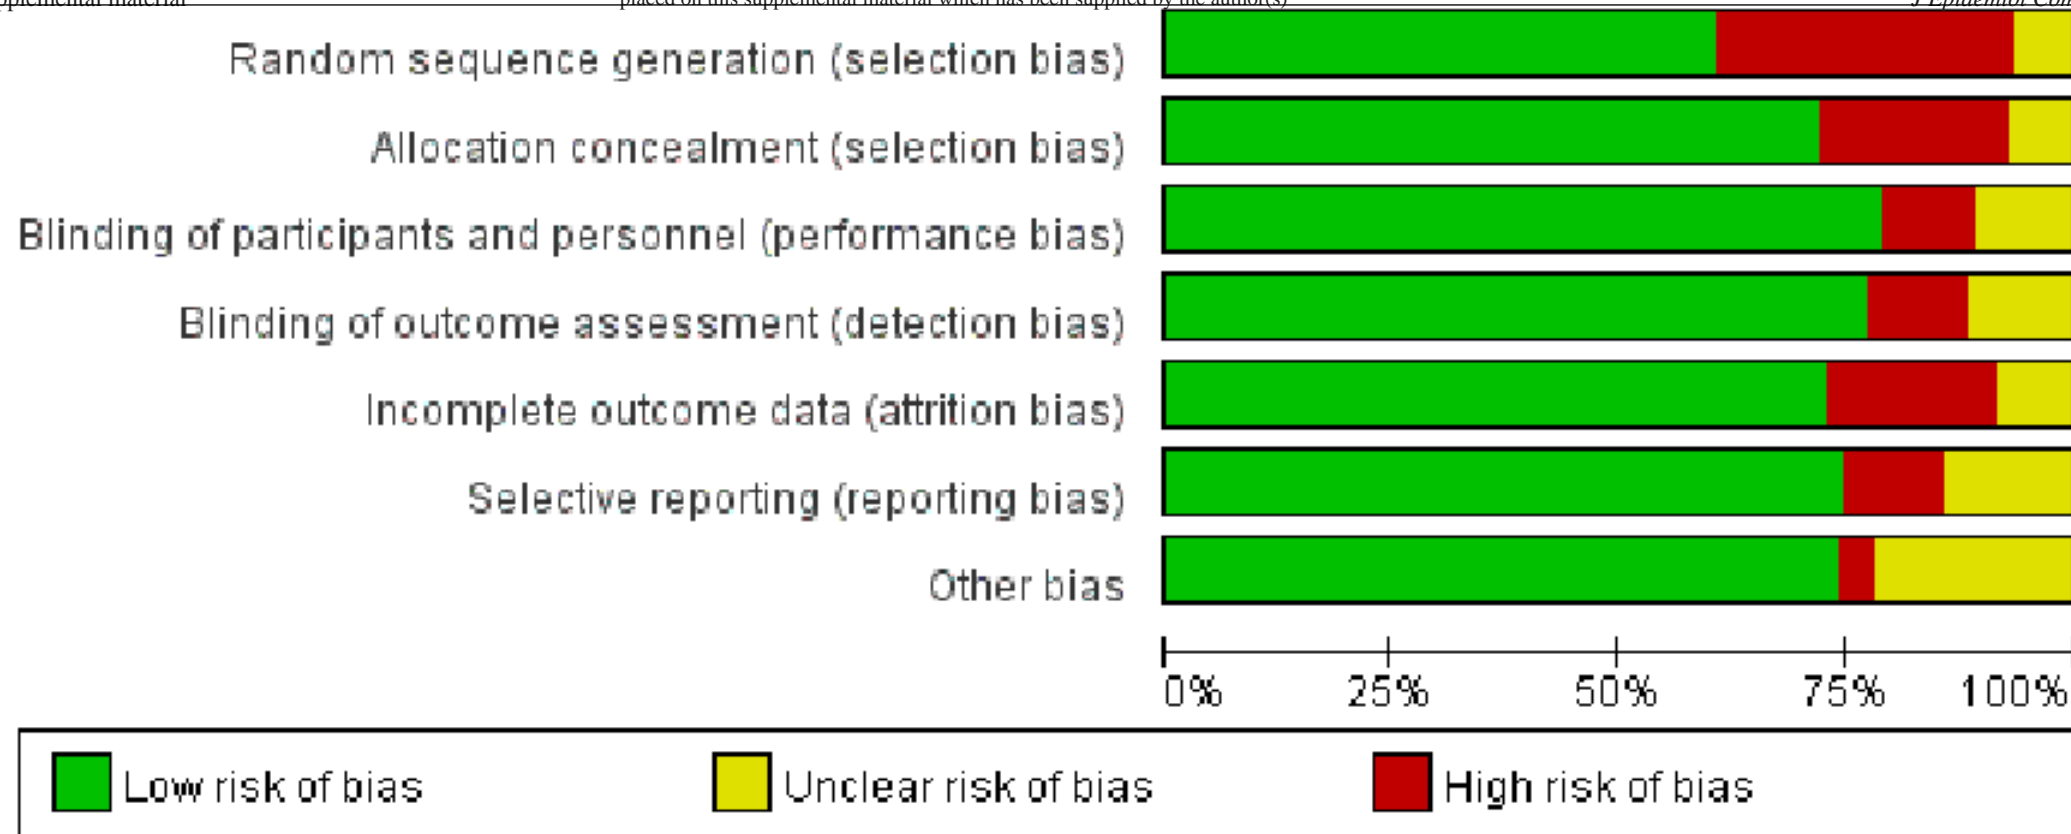

Supplement: jech-2020-215927supp002.pdf [file jech-2020-215927supp002.pdf]

# PTSD (public) during COVID-19

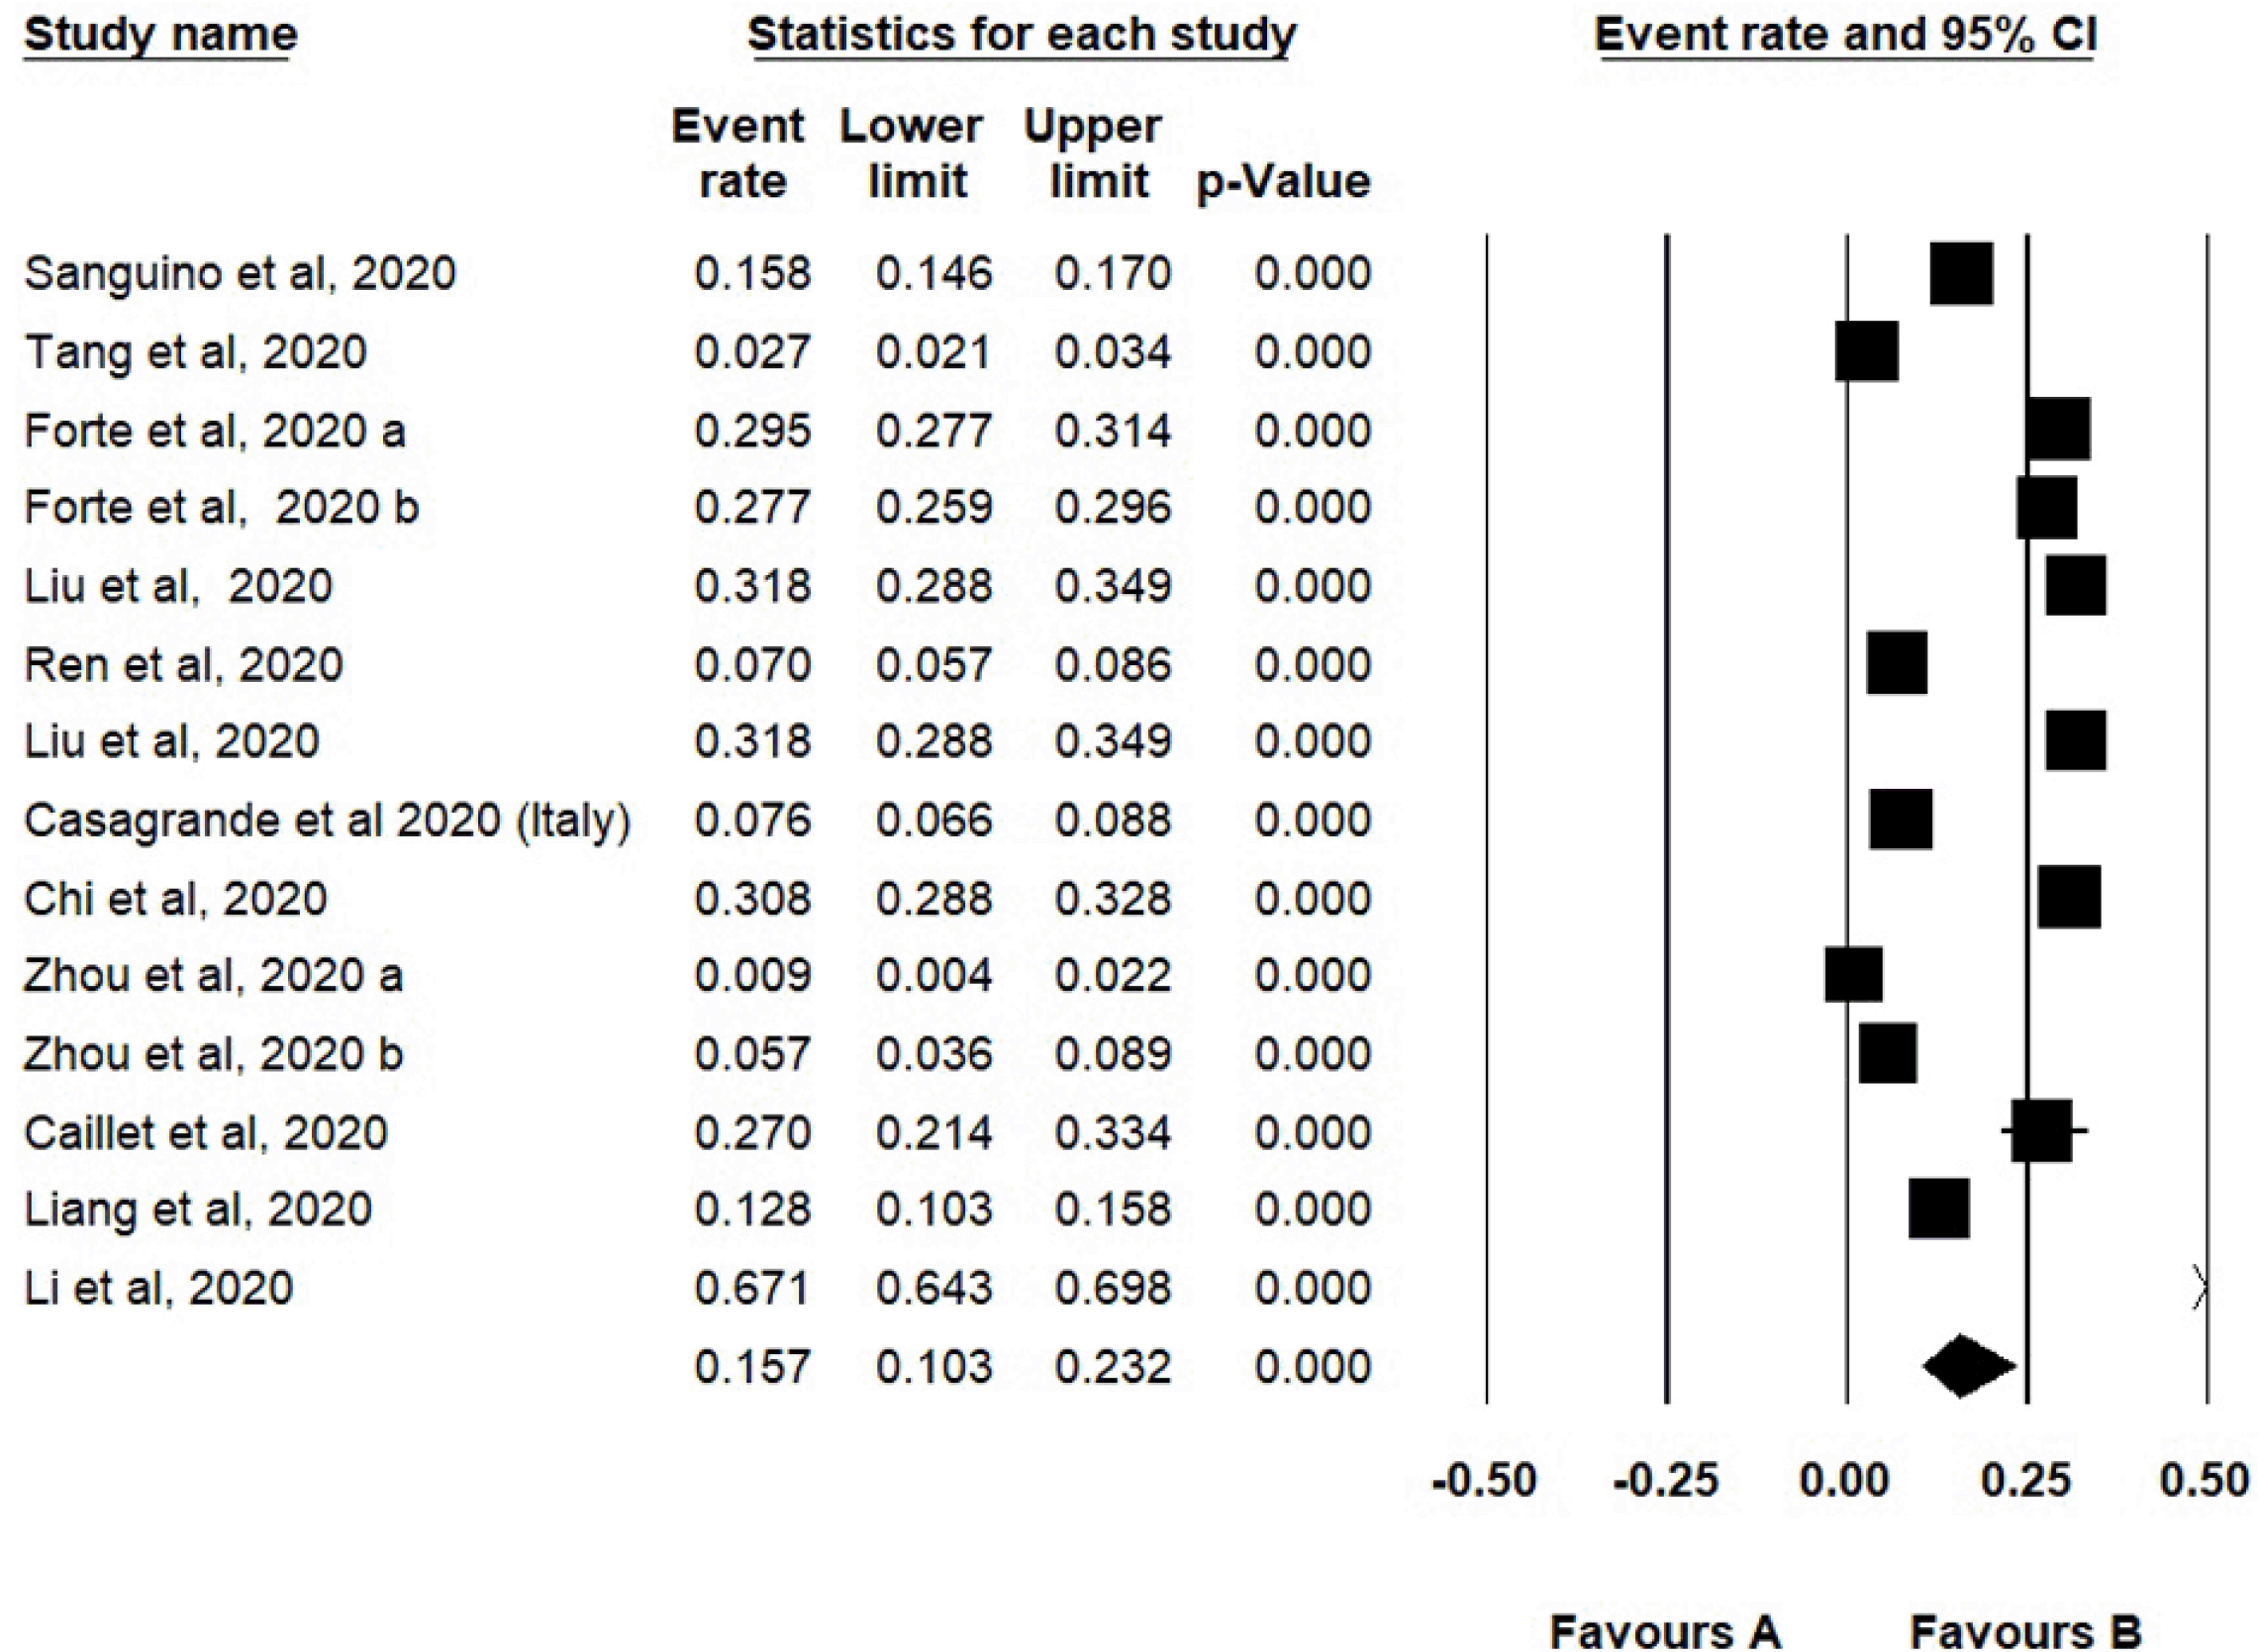

Supplement: jech-2020-215927supp010.pdf [file jech-2020-215927supp010.pdf]

# Anxiety during COVID-19

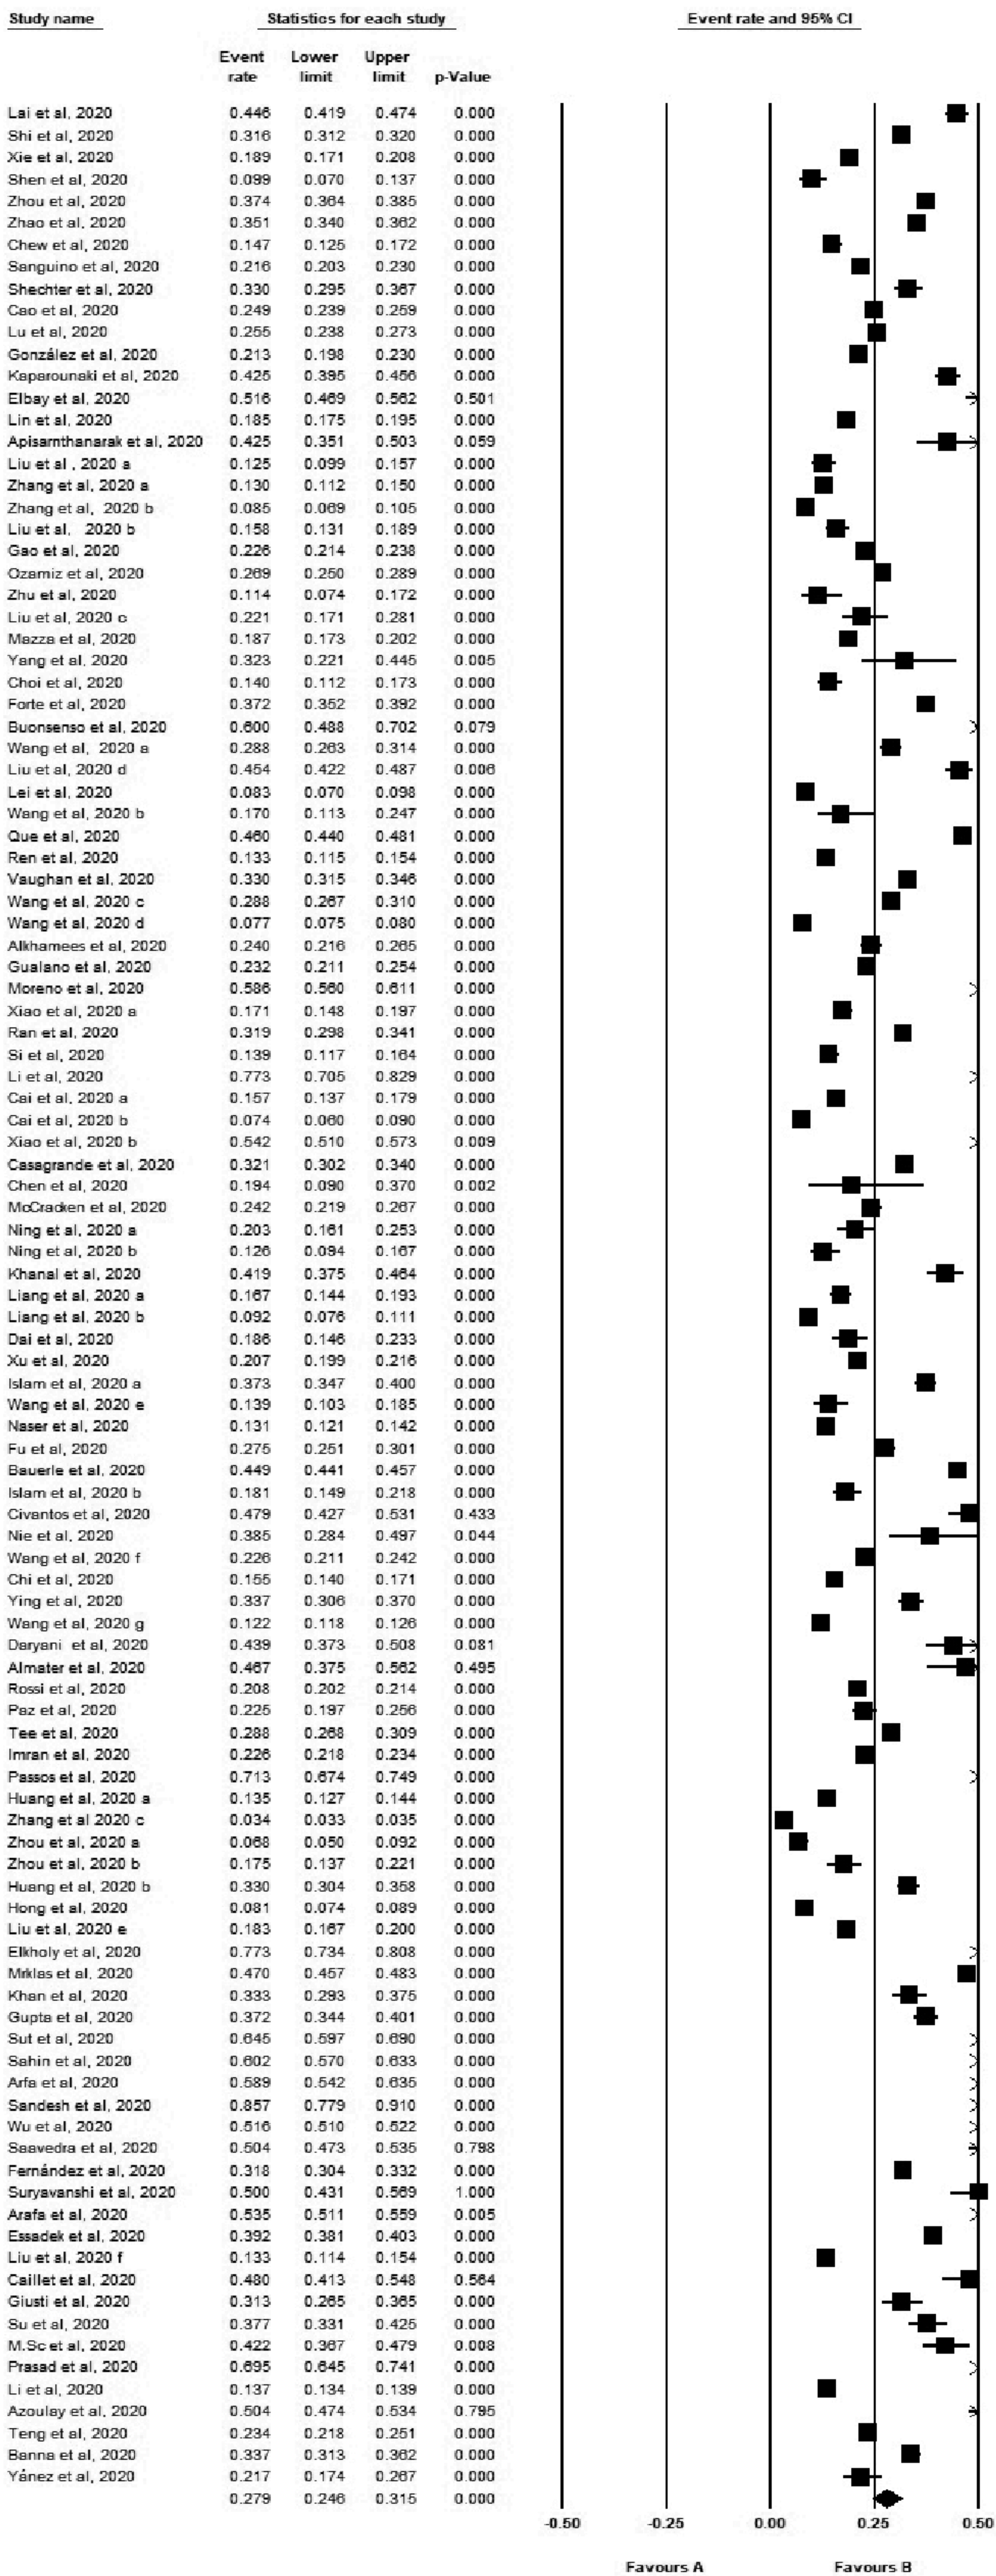

Supplement: jech-2020-215927supp011.pdf [file jech-2020-215927supp011.pdf]

## Depression during SARS and MERS

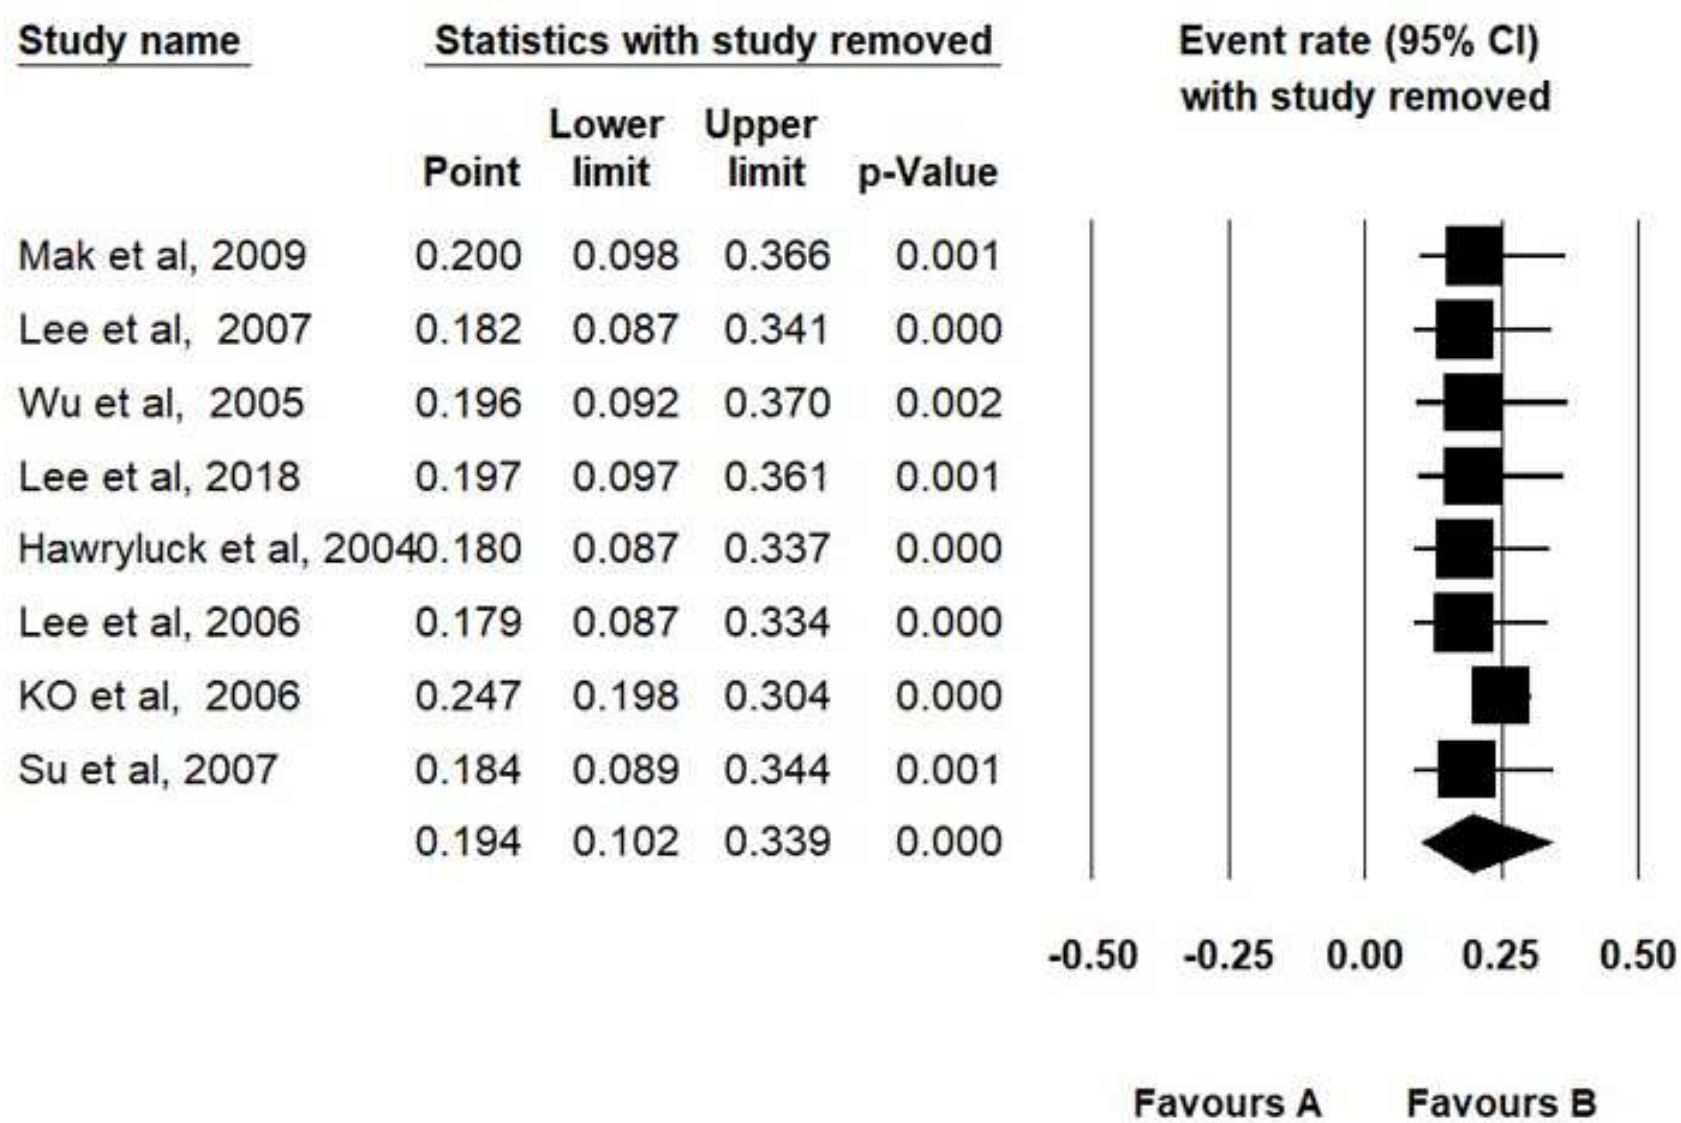

## PTSD during SARS and MERS

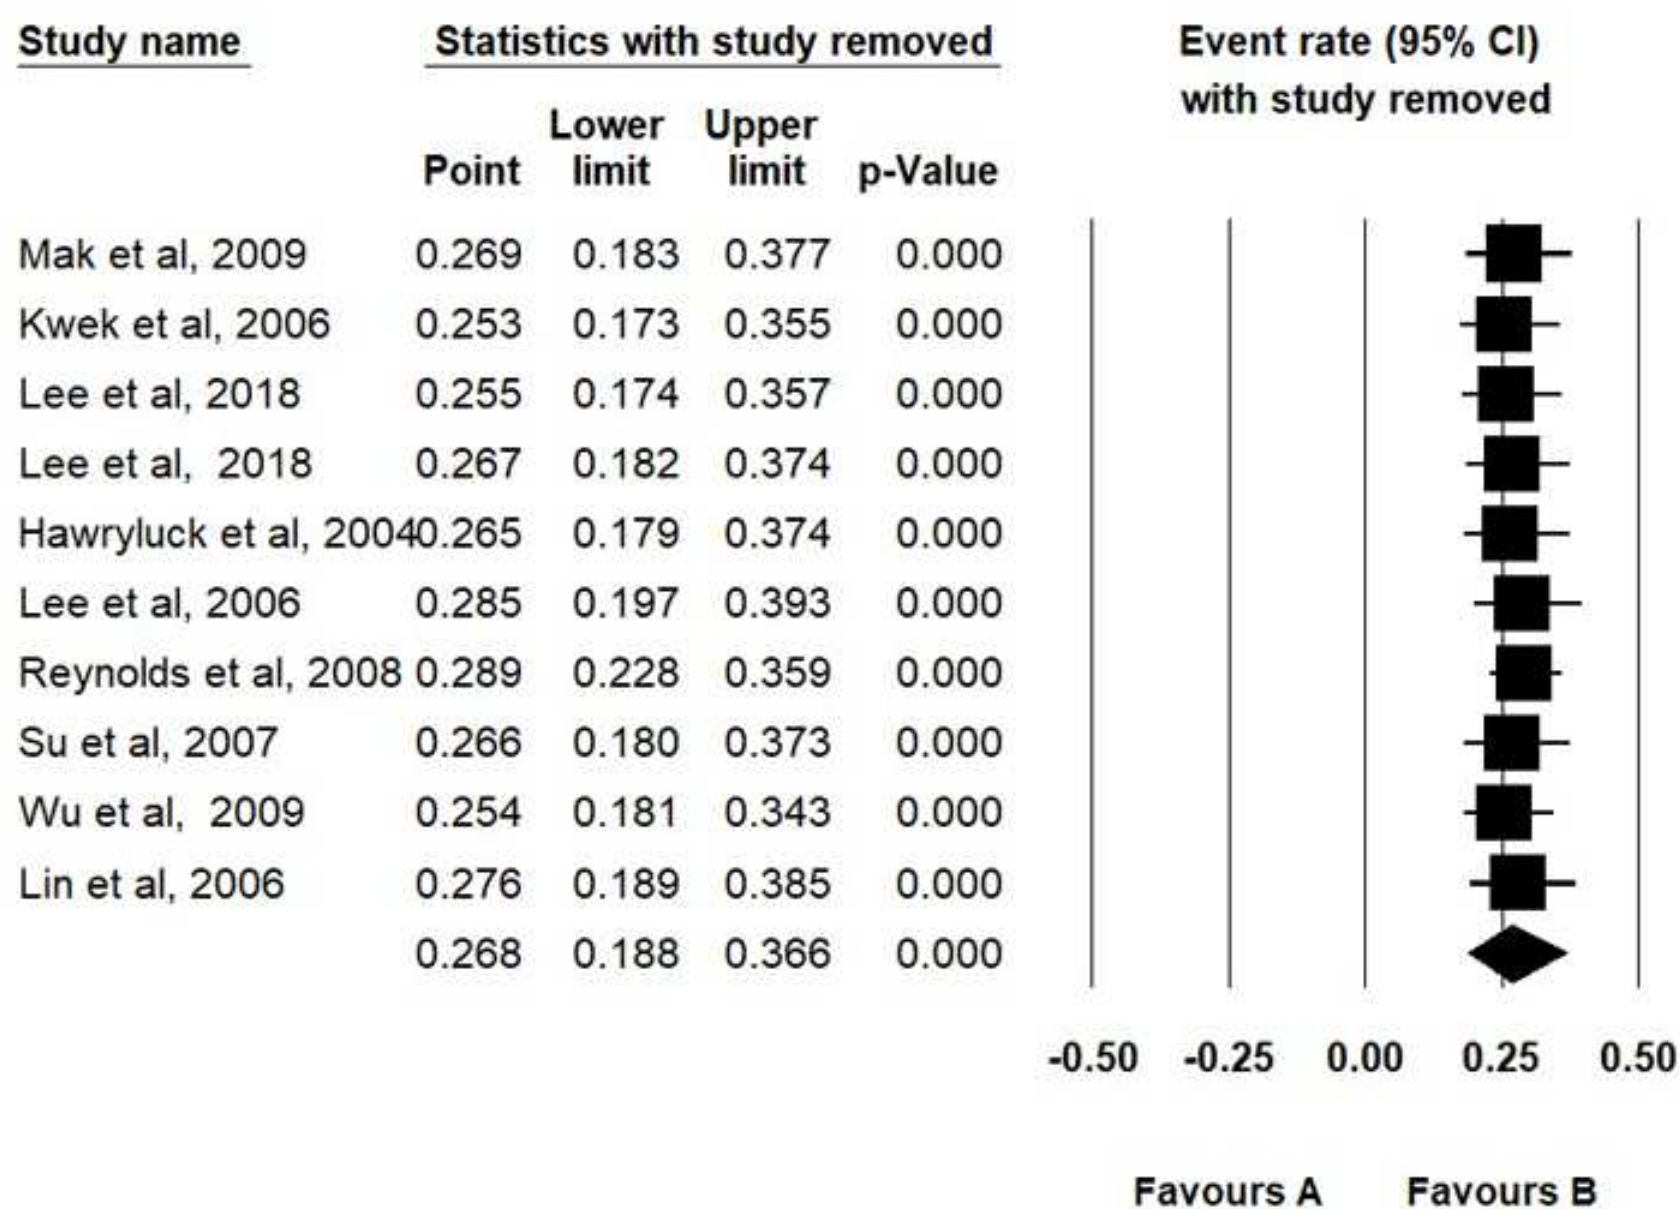

Supplement: jech-2020-215927supp014.pdf [file jech-2020-215927supp014.pdf]
